# Supplementary material
Source: MDPI journal article supplement (https://www.mdpi.com/1099-4300/21/11/1063)
Supplement: s1 [file s1]

# Supplementary Material of the paper: An Integrated Approach for Making Inference on the Number of Clusters in a Mixture Model

Erlandson F. Saraiva, Adriano K. Suzuki, Luís A. Milan and Carlos A. B. Pereira

This supplementary material (SM) presents the criterion used to define a configuration for the latent allocation variables  $\mathbf{c}$  and how we obtain the estimates for parameters of the clusters. Besides, we also show the graphics of the generated and identified clusters by proposed ISEM algorithm and estimates for parameters.

## Appendix 1: Estimation

As decribed in page 7 of the paper, in order to estimate the number of clusters  $k_{\mathbf{c}}$ , we consider  $\mathbb{N}_{k_{\mathbf{c}}}(j)$  be the number of times that  $k_{\mathbf{c}} = j$  in the generated sequence  $\mathbb{S}(H)$ , for  $j \in \{1, \dots, K_{max}\}$ , and calculate  $N_{k=j}$ , which denotes the number of times that  $k_{\mathbf{c}} = j$  in  $\mathbb{S}(H)$ . Letting  $\tilde{P}(k_{\mathbf{c}} = j) = \frac{\mathbb{N}_{k_{\mathbf{c}}}(j)}{H}$  be the posterior probability for  $k_{\mathbf{c}} = j$ , then  $\tilde{k}_{\mathbf{c}} = \arg \max_{1 \leq j \leq k_m} (P(k = j | \cdot))$  is the estimate for the number of components.

Conditional on estimate  $\tilde{k}_{\mathbf{c}}$ , consider

- (i)  $L_{\tilde{k}_{\mathbf{c}}} = \sum_{\mathbb{S}(H)} \mathcal{I}_{k_{\mathbf{c}}^{(s)}}(\tilde{k}_{\mathbf{c}})$ , where  $\mathcal{I}_{k_{\mathbf{c}}^{(s)}}(\tilde{k}_{\mathbf{c}}) = 1$  if the  $s$ -th value of  $\mathbb{S}(H)$  is  $k_{\mathbf{c}} = \tilde{k}_{\mathbf{c}}$  and  $\mathcal{I}_{k_{\mathbf{c}}^{(s)}}(\tilde{k}_{\mathbf{c}}) = 0$  otherwise, the number of times in which  $k_{\mathbf{c}} = \tilde{k}_{\mathbf{c}}$  in the sequence  $\mathbb{S}(H)$ ;
- (ii)  $N_{ij} = \sum_{\mathbb{S}(H)} \mathcal{I}_{c_i^{(s)}}(j) \mathcal{I}_{k_{\mathbf{c}}^{(s)}}(\tilde{k}_{\mathbf{c}})$ , where  $\mathcal{I}_{c_i^{(s)}}(j) = 1$  if in  $s$ -th iteration  $c_i = j$  and  $\mathcal{I}_{c_i^{(s)}}(j) = 0$  otherwise, the number of times that  $y_i$  is associated to component  $j$  in  $L_{\tilde{k}_{\mathbf{c}}}$  iterations,  $i = 1, \dots, n$  and  $j = 1, \dots, \tilde{k}_{\mathbf{c}}$ .

Then, we define the posterior probability of the observation  $y_i$  to be from component  $j$  as  $P_{ij} = N_{ij} / L_{\tilde{k}_{\mathbf{c}}}$ . If  $P_{ij} = \max_{1 \leq j \leq \tilde{k}_{\mathbf{c}}} (P_{ij})$ , we consider that  $y_i$  is from component  $j$ , for  $i = 1, \dots, n$  and  $j = 1, \dots, \tilde{k}_{\mathbf{c}}$ .

We estimate the component parameter  $\theta_j$  of the  $j$ -th cluster, for  $j = 1, \dots, \tilde{k}_{\mathbf{c}}$ , considering the average of the generated values, *i.e.*,

$$\tilde{\theta}_j | \tilde{k}_{\mathbf{c}} = \frac{1}{L_{\tilde{k}_{\mathbf{c}}}} \sum_{s=B+1}^S \phi_j^{(s)} \mathcal{I}_{k_{\mathbf{c}}^{(s)}}(\tilde{k}_{\mathbf{c}}).$$

## Appendix 2: Generated and identified clusters

In this section, we present some additional results from simulation study. Figure 1 shows the generated values and the identified clusters by the ISEM algorithm for datasets  $A_1$  and  $A_2$ . Figure 2 shows the generated values and the identified clusters by the ISEM algorithm for datasets  $A_3$  and  $A_4$ .

The clusters were defined according to the procedure describe in Appendix 1. As one can note, clusters are satisfactorily identified by the proposed algorithm.

Table 1 shows the estimates for component parameters of the identified clusters and the empirical credibilities intervals (95%) for parameters of datasets  $A_1$  and  $A_2$ . Figure 3 shows the histogram of the observed data and the estimated density function.

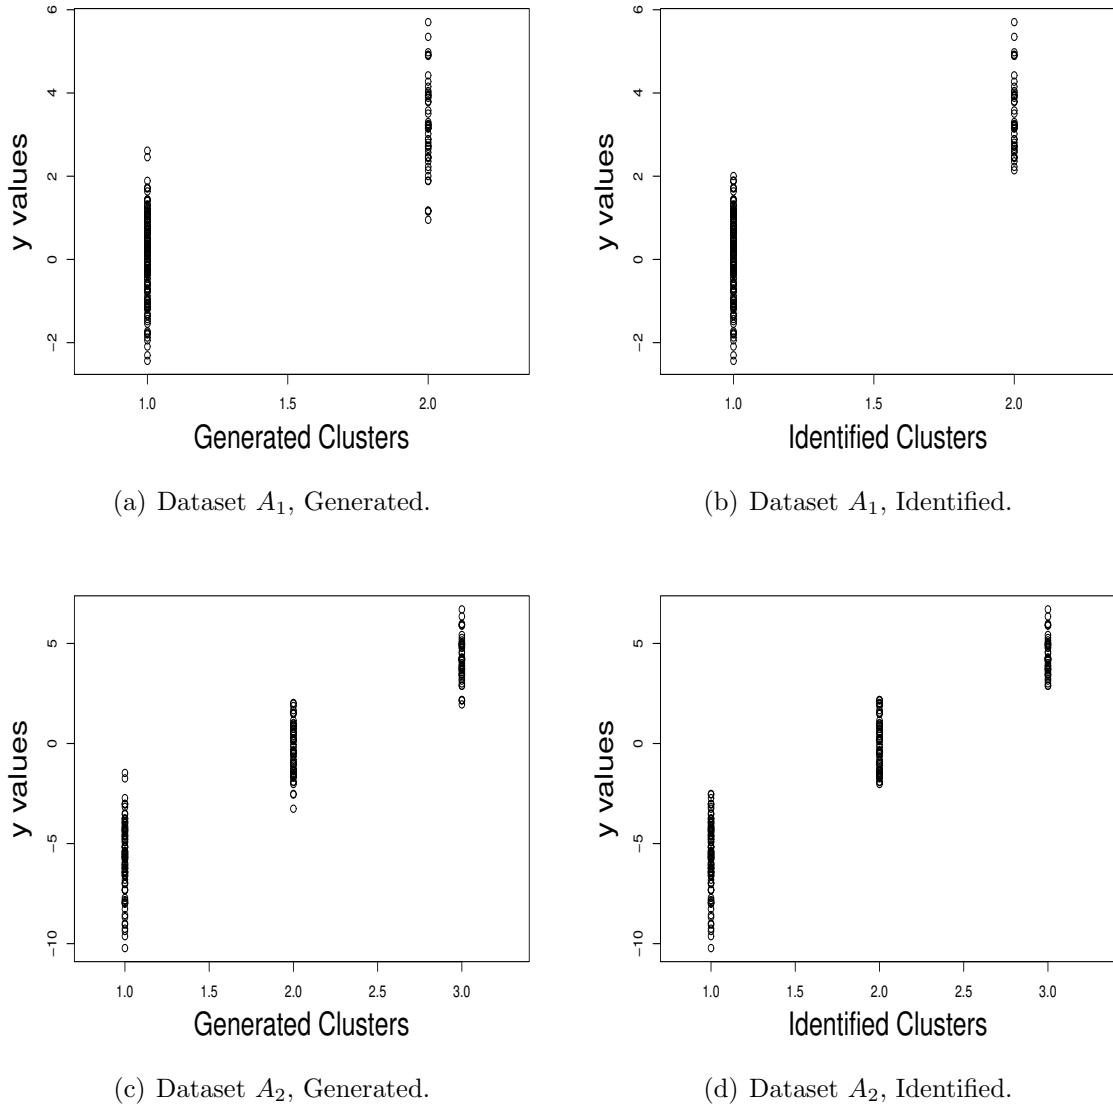

Figure 1: Generated values and the identified clusters by the ISEM algorithm.

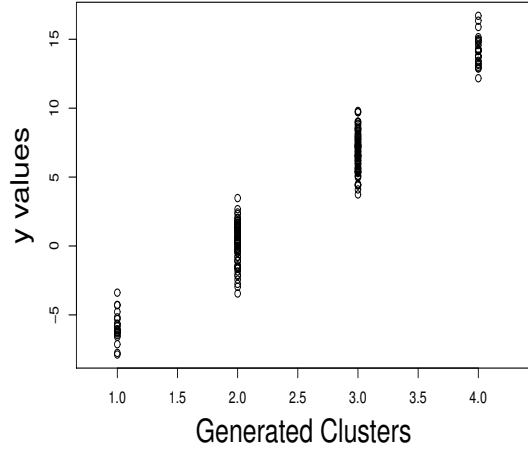

(a) Dataset  $A_1$ , Generated.

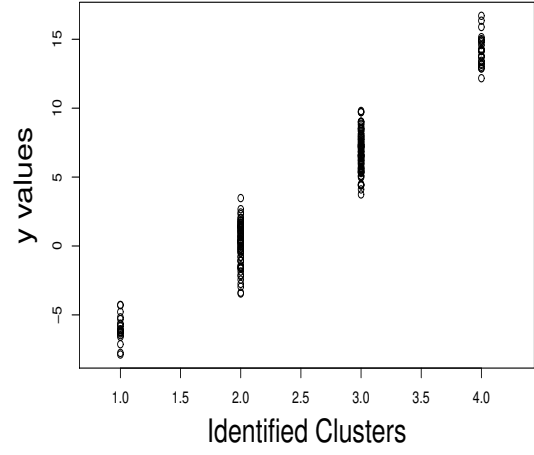

(b) Dataset  $A_1$ , Identified.

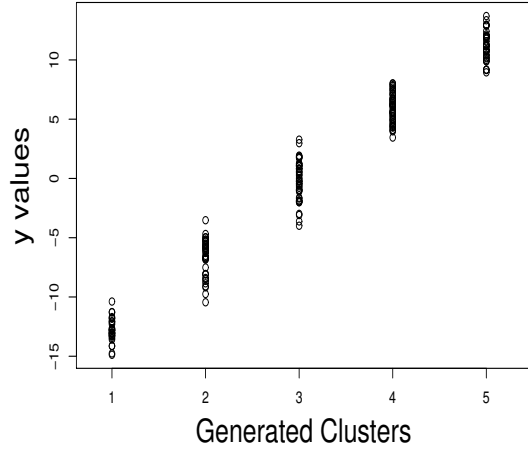

(c) Dataset  $A_2$ , Generated.

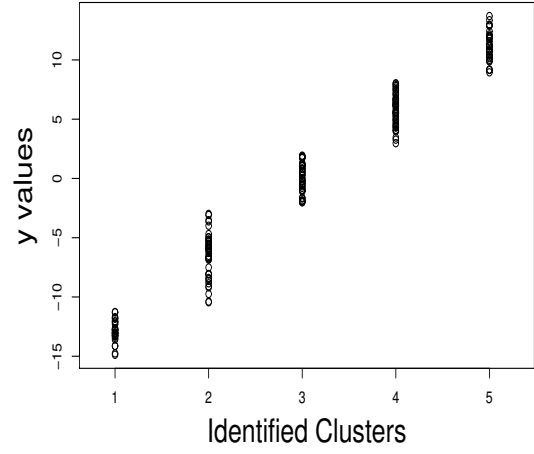

(d) Dataset  $A_2$ , Identified.

Figure 2: Generated values and the identified clusters by the ISEM algorithm.

Table 1: Estimates for component parameters of the  $\tilde{k}_c$  clusters.

| Parameter | Data set                    |                               | Parameter    | Data set                   |                             |
|-----------|-----------------------------|-------------------------------|--------------|----------------------------|-----------------------------|
|           | $A_1$                       | $A_2$                         |              | $A_1$                      | $A_2$                       |
| $\mu_1$   | 0.0892<br>(-0.0810, 0.2360) | -5.5705<br>(-5.9938, -5.0868) | $\sigma_1^2$ | 1.1111<br>(0.9074, 1.3809) | 3.7208<br>(2.7779, 5.1638)  |
| $\mu_2$   | 3.2937<br>(2.5563, 3.6751)  | -0.0560<br>(-0.5754, 0.4957)  | $\sigma_2^2$ | 1.1876<br>(0.7426, 2.2491) | 2.5742<br>(1.1976, 6.70054) |
| $\mu_3$   | —                           | 4.3179<br>(3.9722, 4.5729)    | $\sigma_3^2$ | —                          | 1.1118<br>(0.7565, 1.7803)  |

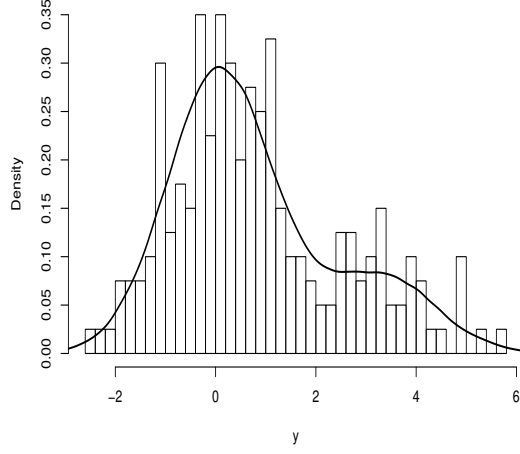

(a) Dataset  $A_1$ , Generated.

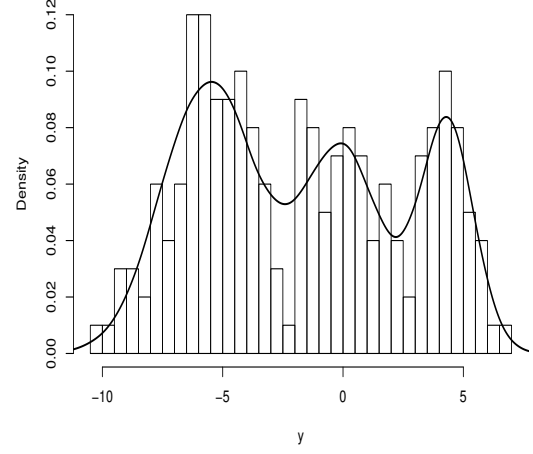

(b) Dataset  $A_1$ , Identified.

Figure 3: Histogram of generated dataset and estimated density for datasets  $A_1$  and  $A_2$ .

Table 2 shows the estimates for component parameters of the identified clusters and the empirical credibilities intervals (95%) for parameters of datasets  $A_3$  and  $A_4$ . Figure 4 shows the histogram of the observed data and the estimated density function.

Table 2: Estimates for component parameters of the  $\tilde{k}_c$  clusters.

| Parameter | Data set                      |                                  | Parameter    | Data set                   |                            |
|-----------|-------------------------------|----------------------------------|--------------|----------------------------|----------------------------|
|           | $A_3$                         | $A_4$                            |              | $A_3$                      | $A_4$                      |
| $\mu_1$   | -5.8787<br>(-6.1965, -5.2799) | -12.8645<br>(-13.0360, -12.7018) | $\sigma_1^2$ | 1.2591<br>(0.6456, 2.7882) | 0.8654<br>(0.5213, 1.2372) |
| $\mu_2$   | 0.2999<br>(0.1314, 0.5051)    | -6.3791<br>(-6.9645, -5.4280)    | $\sigma_2^2$ | 2.3361<br>(1.5482, 3.2709) | 2.4554<br>(1.6450, 4.1544) |
| $\mu_3$   | 6.1970<br>(6.8023, 7.0266)    | 0.0975<br>(-0.2085, 0.4903)      | $\sigma_3^2$ | 1.9360<br>(1.7023, 2.2830) | 1.8476<br>(1.0119, 3.0996) |
| $\mu_4$   | 14.1870<br>(14.1863, 14.1863) | 5.9537<br>(5.7438, 6.1972)       | $\sigma_4^2$ | 1.2389<br>(0.7386, 2.2870) | 1.9687<br>(1.3533, 3.0779) |
| $\mu_5$   | —                             | 11.2635<br>(11.0470, 11.4631)    | $\sigma_5^2$ | —                          | 1.4249<br>(1.0509, 1.9775) |

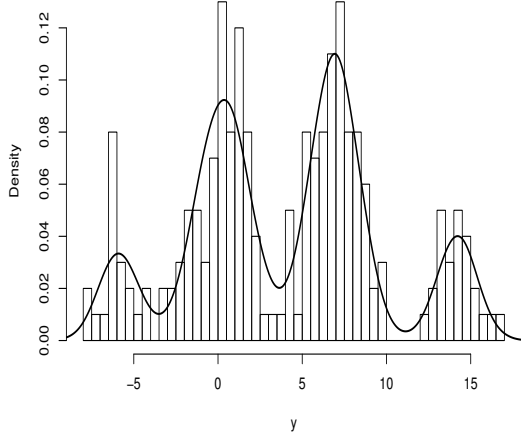

(a) Dataset  $A_1$ , Generated.

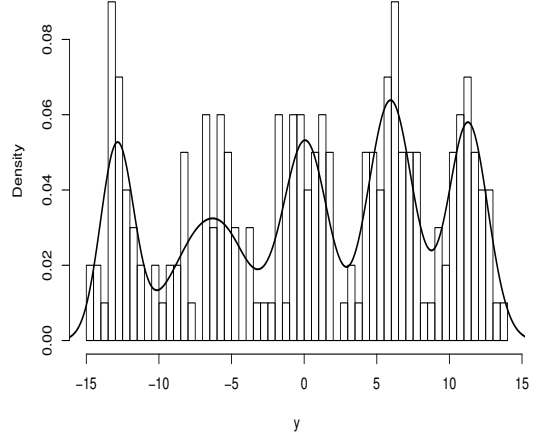

(b) Dataset  $A_1$ , Identified.

Figure 4: Histogram of generated dataset and estimated density for datasets  $A_1$  and  $A_2$ .

## Appendix 3: Some details on Equation 5

From Equation (4) of the manuscript, we have that

$$\pi(\mathbf{c}|\mathbf{w}, k) = \prod_{j=1}^k w_j^{n_j}, \quad (1)$$

where  $n_j$  is the number of observations allocated to  $j$ -th component.

As we assume that  $\mathbf{w} = (w_1, \dots, w_k) | \gamma, k \sim \text{Dirichlet}(\frac{\gamma}{k}, \dots, \frac{\gamma}{k})$ , then

$$\pi(\mathbf{w}|k, \gamma) = \frac{\Gamma(\gamma)}{[\Gamma(\frac{\gamma}{k})]^k} \prod_{j=1}^k w_j^{\frac{\gamma}{k}-1}. \quad (2)$$

Thus,

$$\begin{aligned} \pi(\mathbf{c}|k, \gamma) &= \int \dots \int \pi(c_1, \dots, c_k | \mathbf{w}, k) \pi(w_1, \dots, w_k | \gamma, k) dw_1 \dots dw_k \\ &= \frac{\Gamma(\gamma)}{[\Gamma(\frac{\gamma}{k})]^k} \int \prod_{j=1}^k w_j^{n_j + \frac{\gamma}{k} - 1} dw_j \\ &= \frac{\Gamma(\gamma)}{[\Gamma(\frac{\gamma}{k})]^k} \frac{1}{n + \gamma} \prod_{j=1}^k \Gamma(n_j + \frac{\gamma}{k}) \\ &= \frac{\Gamma(\gamma)}{\Gamma(n + \gamma)} \prod_{j=1}^k \frac{\Gamma(n_j + \frac{\gamma}{k})}{\Gamma(\frac{\gamma}{k})}. \end{aligned}$$
